# Supplementary material for: The scaffolding protein flot2 promotes cytoneme-based transport of wnt3 in gastric cancer
Source: eLife. 2022 Aug 30;11:e77376. doi: 10.7554/eLife.77376 (PMC9457691; doi:10.7554/eLife.77376)
Supplement: Figure 1—source data 1. — Beta-actin was used as the loading control. [file elife-77376-fig1-data1.xlsx]

## Sheet: Fig. 1B
Fig. 1B
Filopodia length
	Average length				Cumulative length				Average number
	MKN28	MKN7	AGS		MKN28	MKN7	AGS		MKN28	MKN7	AGS
	1.35979	3.22842	6.21662		39.434	106.538	130.549		29	33	21
	1.98917	2.4229	6.51665		47.74	50.881	110.783		24	21	21
	2.00584	2.49885	4.14943		76.222	82.462	124.483		38	33	30
	1.47236	2.52364	5.08669		36.809	55.52	259.421		25	22	51
	1.53007	2.33128	5.96111		21.421	58.282	220.561		14	25	37
	1.19556	2.23211	6.86803		19.129	40.178	487.63		16	18	71
	1.60785	4.00725	5.41761		32.157	128.232	335.892		20	32	62
		2.17071	5.36265			36.902	332.484			17	62
			6.13396				294.43				48
			3.75286				187.643				50
			5.72283				137.348				24
			3.48948				153.537				44
			3.36506				114.412				34
			3.57032				157.094				44
			5.53847				432.001				78
			7.75903				232.771				30
			6.86221				288.213				42
			4.7225				207.79				44
			4.77018				157.416				33
			4.05856				101.464				24
			4.81816				120.454				25
			5.79057				387.968				67
			5.20155				275.682				54
			4.25707				238.396				56
			5.04948				166.633				33

## Sheet: Fig. 1D
Supp. Fig. 1C
Percentage of Wnt3-positive filopodia
	HFE	AGS	AGS + Wnt3
	11.1111	36.3636	50
	13.3333	50	62.5
	25	23.8095	71.4286
	26.6667	26.087	40
	20	47.0588	63.6364
	15.7895	30.7692	50
		16.6667
		30.7692
