# Supplementary material for: The scaffolding protein flot2 promotes cytoneme-based transport of wnt3 in gastric cancer
Source: eLife. 2022 Aug 30;11:e77376. doi: 10.7554/eLife.77376 (PMC9457691; doi:10.7554/eLife.77376)
Supplement: Figure 2—figure supplement 1—source data 1. — Cells were treated with control or Flot2 siRNA (3 or 4 µl) for 48 hr prior to lysate collection. Beta-actin was used as the loading control. [file elife-77376-fig2-figsupp1-data1.xlsx]

## Sheet: Fig. 2-supplement Fig. 1B
Supp. Fig. 1B
Filopodia quantifications (IRSp53)
	Filopodia Length			Cumulative Length			Filopodia Number
	WT	IRSp53-4K	Flot2 + IRSp53-4K	WT	IRSp53-4K	Flot2 + IRSp53-4K	WT	IRSp53-4K	Flot2 + IRSp53-4K
	6.21662	2.29017	1.96973	130.549	13.741	29.546	21	6	15
	6.51665	5.14835	3.34092	110.783	87.522	40.091	21	17	12
	4.14943	4.38752	2.92307	124.483	100.913	43.846	30	23	15
	5.08669	3.5705	2.75852	259.421	35.705	57.929	51	10	21
	5.96111	3.19304	3.70148	220.561	83.019	77.731	37	26	21
	6.86803	2.26616	3.2376	487.63	43.057	48.564	71	19	15
	5.41761	5.207	3.58842	335.892	52.07	154.302	62	10	43
	5.36265	2.20973	4.23133	332.484	57.453	63.47	62	26	15
	6.13396	3.40073	4.58432	294.43	37.408	114.608	48	11	25
	3.75286	3.70382	3.4405	187.643	40.742	96.334	50	11	28
	5.72283	2.84633	7.14925	137.348	34.156	28.597	24	12	4
	3.48948	3.37027	5.27411	153.537	37.073	100.208	44	11	19
	3.36506	1.89706	3.97686	114.412	32.25	55.676	34	17	14
	3.57032			157.094			44
	5.53847			432.001			78
	7.75903			232.771			30
	6.86221			288.213			42
	4.7225			207.79			44
	4.77018			157.416			33
	4.05856			101.464			24
	4.81816			120.454			25
	5.79057			387.968			67
	5.20155			275.682			54
	4.25707			238.396			56
	5.04948			166.633			33
	5.21764	3.34544	3.8597	226.202	50.393	70.0694	43.4	15.3077	19

## Sheet: Fig. 2-supplement Fig. 1C
Supp. Fig. 2C
Average filopodia length
				HFE						AGS
		Filopodia Length						Filopodia Length
		WT	Ctrl siRNA	Flot2-GFP	∆N-Flot2-GFP	Flot2 siRNA		WT	Ctrl siRNA	Flot2-GFP	∆N-Flot2-GFP	Flot2 siRNA
		2.90481	3.14995	5.20052	1.38447	2.02358		6.21662	4.58338	5.46279	1.519	3.08088
		3.38609	3.13475	4.04849	1.458	2.62346		6.51665	4.67023	3.3508	2.1072	2.20108
		2.97096	3.31616	4.63746	1.81956	3.02841		4.14943	4.83074	3.0338	2.34792	3.02707
		2.04763	2.74188	3.66756	2.01276	2.31007		5.08669	5.17784	2.37888	3.05274	2.05136
		3.28711	2.32524	3.29853	1.59467	1.59816		5.96111	4.29681	4.37615	2.26735	1.80579
		1.98079	3.07983	3.85467	1.864	1.92374		6.86803	8.39292	12.9687	1.4305	4.0439
		3.04274	4.04266	3.37812	2.18821	2.75815		5.41761	6.12444	1.99116	2.0002	3.07494
		2.22219	1.65136	6.30191	1.57566	3.49685		5.36265	7.86727	2.93367	1.54188	2.06847
		2.752	3.15446	5.90479	1.57365	2.17629		6.13396	4.94503	3.69395	2.21007	2.18758
		3.0577	2.94969	2.9595	1.58708	2.1653		3.75286	3.06431	3.85245	1.88662	2.63732
		2.78717	2.29048	4.09694	1.8253	1.90717		5.72283	8.00484	3.03124	2.209	1.96776
		3.11308	2.49383	4.01812	1.85945	1.69534		3.48948	3.59514	6.19276	1.478	2.0306
		2.958	2.53714	3.82348	1.44608	2.28177		3.36506	5.23044	8.93699	3.09685	3.80508
		2.42994	2.02208	3.3284	2.00317	1.92745		3.57032	5.22224	5.08354	2.03856	2.15907
		2.63833	3.36388	2.87574	1.9414	2.69585		5.53847	5.91296	3.45929	2.93795	3.70487
		1.9589	2.77429	2.45152	2.03719	2.39319		7.75903	7.93487	4.24954	1.87773	2.287
		2.59461	2.70878	2.36241	2.32379	2.30456		6.86221	3.2893	8.98736	2.3453	3.54587
		3.2717	2.85856	3.14314	2.16261	2.41715		4.7225	3.87583	3.0558	2.83367	5.92542
		2.75862	3.35632	2.8279	1.85775	1.83022		4.77018	5.96141	5.49963	2.25534	2.32227
		2.48729		5.33844	1.5909	2.26738		4.05856	5.481	7.16932	2.55	3.06653
		3.67797		4.99544	1.76767	2.72735		4.81816	3.93314	5.09169	4.007	2.41281
		3.45883		4.09842	1.685	1.83757		5.79057		6.02381	3.29025	3.35415
				7.02774	1.68844	1.64472		5.20155		2.50996	2.20168	1.52662
				4.03877		1.7227		4.25707		3.12868	2.42707	1.74597
				3.75684				5.04948		9.54794	2.99121	2.34437
		2.80848	2.83954	3.93689	1.79334	2.23985		5.21764	5.3521	5.0404	2.35612	2.73507
