# Supplementary material for: The scaffolding protein flot2 promotes cytoneme-based transport of wnt3 in gastric cancer
Source: eLife. 2022 Aug 30;11:e77376. doi: 10.7554/eLife.77376 (PMC9457691; doi:10.7554/eLife.77376)
Supplement: Figure 2—source data 1. — Beta-actin was used as the loading control. [file elife-77376-fig2-data1.xlsx]

## Sheet: Fig. 2C
Fig. 2C
Paracrine TCF Reporter Quantifications (relative)
		Control	IRSp534K	Wnt3	Wnt3 + IRSp534K			Categorised by value (ascending)
		0.104636	0.107754	0.121464	0.09239
		0.10585	0.107864	0.124494	0.0954071
		0.108284	0.108234	0.126008	0.0982747
		0.108863	0.114884	0.126016	0.106882
		0.112324	0.115607	0.13022	0.115182
		0.121636	0.116134	0.13531	0.118066
		0.124489	0.118023	0.143535	0.120051
		0.129049	0.118998	0.146857	0.128583
		0.131935	0.119438	0.158709	0.128644
		0.151916	0.120912	0.160822	0.12911
		0.153995	0.121006	0.161993	0.130887
		0.157011	0.122613	0.162535	0.131762
		0.168473	0.122627	0.164387	0.132912
		0.170206	0.123637	0.165157	0.136077
		0.170955	0.123856	0.167142	0.138181
		0.171307	0.124564	0.168309	0.139098
		0.173846	0.125161	0.168901	0.139582
		0.190049	0.1259	0.169902	0.14253
		0.192182	0.12677	0.171878	0.145887
		0.192624	0.127514	0.172104	0.146203
		0.206427	0.128293	0.173496	0.147053
		0.211895	0.129537	0.174012	0.14836
		0.213771	0.130177	0.174122	0.149644
		0.216995	0.130259	0.17538	0.151301
		0.217393	0.130439	0.177459	0.151358
		0.21906	0.130915	0.179377	0.15241
		0.222801	0.131374	0.17962	0.153864
		0.223074	0.131684	0.187868	0.154297
		0.226614	0.132293	0.195106	0.154918
		0.227003	0.132468	0.195848	0.154975
		0.228574	0.133353	0.197471	0.155252
		0.229719	0.133391	0.197736	0.15645
		0.23463	0.134055	0.198234	0.156845
		0.235168	0.134409	0.199687	0.160863
		0.239329	0.13642	0.199815	0.161889
		0.242063	0.141221	0.202437	0.16237
		0.242108	0.141825	0.20474	0.165264
		0.242753	0.142745	0.206892	0.165456
		0.244104	0.142783	0.207279	0.165838
		0.24443	0.145141	0.208412	0.166644
		0.24491	0.145753	0.21019	0.166924
		0.245354	0.14607	0.21068	0.167685
		0.246193	0.149037	0.212416	0.168607
		0.24682	0.149107	0.212502	0.168838
		0.249084	0.149271	0.213975	0.168914
		0.24912	0.149287	0.216115	0.169288
		0.252372	0.149448	0.216431	0.171962
		0.253618	0.150273	0.217147	0.172496
		0.255712	0.151916	0.217337	0.173225
		0.258798	0.152768	0.217634	0.173258
		0.259042	0.15591	0.217766	0.173338
		0.259081	0.15606	0.219197	0.17472
		0.261303	0.156288	0.219455	0.175481
		0.261315	0.157058	0.220862	0.175989
		0.262389	0.157134	0.221436	0.176125
		0.263078	0.157198	0.222324	0.179075
		0.264901	0.157239	0.223377	0.183922
		0.269087	0.158041	0.223777	0.185476
		0.270516	0.158305	0.224603	0.187807
		0.271242	0.158452	0.225391	0.190844
		0.273031	0.158649	0.225809	0.191873
		0.27519	0.158757	0.226407	0.191916
		0.275284	0.160249	0.226731	0.192045
		0.276766	0.160811	0.228854	0.19435
		0.280223	0.162989	0.229736	0.197624
		0.280525	0.163469	0.231141	0.197643
		0.281217	0.163716	0.231301	0.19839
		0.283519	0.163774	0.232041	0.198758
		0.284916	0.164351	0.233113	0.1996
		0.286788	0.164461	0.238032	0.201438
		0.287761	0.164492	0.238482	0.203762
		0.289878	0.164544	0.241366	0.204629
		0.292176	0.165596	0.241655	0.205476
		0.292623	0.166602	0.249334	0.205815
		0.294204	0.168021	0.252078	0.206369
		0.296019	0.168899	0.252264	0.206633
		0.297166	0.168994	0.25286	0.207447
		0.299261	0.169403	0.259881	0.210455
		0.300132	0.170127	0.264033	0.21087
		0.303449	0.170757	0.264241	0.21096
		0.303735	0.171187	0.264787	0.21217
		0.306262	0.171214	0.268094	0.217782
		0.307642	0.171478	0.268617	0.220392
		0.307664	0.172368	0.269931	0.225248
		0.311817	0.173	0.27024	0.227131
		0.312231	0.173041	0.271405	0.228985
		0.313806	0.173504	0.271502	0.229021
		0.315896	0.17532	0.277073	0.236744
		0.31706	0.175692	0.280725	0.237543
		0.320267	0.175923	0.282138	0.237645
		0.32218	0.175943	0.292481	0.240145
		0.323685	0.176586	0.30227	0.244743
		0.325247	0.177881	0.302949	0.248995
		0.325545	0.178365	0.308502	0.249084
		0.326164	0.178887	0.309383	0.251593
		0.329479	0.179705	0.310314	0.252404
		0.330658	0.179806	0.310883	0.252435
		0.331275	0.181261	0.310908	0.252796
		0.334156	0.181379	0.31189	0.255073
		0.334508	0.182172	0.315354	0.255174
		0.33694	0.182955	0.324916	0.257203
		0.337275	0.183333	0.325747	0.263785
		0.340519	0.183347	0.33093	0.263951
		0.340812	0.184427	0.33244	0.264755
		0.341441	0.184783	0.336719	0.265466
		0.341808	0.184859	0.337403	0.273083
		0.343024	0.184934	0.345518	0.273217
		0.344425	0.185244	0.350722	0.277554
		0.346692	0.18539	0.359772	0.279673
		0.347714	0.18576	0.362104	0.284643
		0.347885	0.186304	0.36336	0.291452
		0.348016	0.186369	0.369173	0.293803
		0.348323	0.187288	0.372853	0.293962
		0.351483	0.188488	0.377757	0.298979
		0.353219	0.189073	0.377993	0.30042
		0.35364	0.18937	0.378213	0.309471
		0.356139	0.189401	0.379575	0.317911
		0.35626	0.189852	0.386282	0.31894
		0.356433	0.190395	0.386661	0.32151
		0.360268	0.190952	0.388073	0.326128
		0.361009	0.191098	0.38905	0.326423
		0.361215	0.191503	0.408167	0.326644
		0.361327	0.191542	0.43916	0.328001
		0.362032	0.192992	0.482369	0.328934
		0.364122	0.193875	0.508915	0.329699
		0.36687	0.193881	0.510555	0.331666
		0.370139	0.193916	0.537505	0.33376
		0.371278	0.194819	0.550995	0.340351
		0.372372	0.195065	0.558592	0.340628
		0.372538	0.195737	0.565889	0.344023
		0.372566	0.197105	0.578019	0.34454
		0.372848	0.198218	0.591071	0.346747
		0.373082	0.198587	0.612568	0.347501
		0.375371	0.198648	0.613677	0.356857
		0.377669	0.199397	0.615807	0.359386
		0.380774	0.199543	0.620107	0.361945
		0.385313	0.199987	0.635501	0.362124
		0.385726	0.200371	0.646545	0.367078
		0.3875	0.200944	0.647106	0.371233
		0.38905	0.202784	0.651917	0.376915
		0.389193	0.203826	0.670706	0.377639
		0.389917	0.204	0.683953	0.388053
		0.390316	0.204192	0.693919	0.390898
		0.390366	0.204219	0.696107	0.392368
		0.391501	0.206471	0.697534	0.394266
		0.393395	0.2093	0.712871	0.396065
		0.396297	0.2117	0.71968	0.398124
		0.403095	0.21321	0.739333	0.401763
		0.403348	0.213639	0.742263	0.402546
		0.405088	0.21378	0.743164	0.407808
		0.405446	0.21514	0.745965	0.411969
		0.405484	0.215377	0.751132	0.415351
		0.405494	0.215953	0.769136	0.420372
		0.406158	0.217502	0.800875	0.42771
		0.40818	0.219629	0.845527	0.444691
		0.408877	0.220729	0.849505	0.448631
		0.410238	0.222157	0.867085	0.459878
		0.412244	0.222206	0.869487	0.460594
		0.417494	0.222773	0.880377	0.46258
		0.417709	0.222951	0.887352	0.472025
		0.418613	0.223373	0.905046	0.474866
		0.42203	0.223573	0.907315	0.476539
		0.423568	0.227038	0.918629	0.47756
		0.427158	0.229166	0.925003	0.487266
		0.433013	0.229654	0.931653	0.489429
		0.435845	0.236907	0.937442	0.508155
		0.436034	0.237606	0.968921	0.517872
		0.437328	0.240199	0.983595	0.518483
		0.439854	0.241608	1.04937	0.534723
		0.444431	0.247926	1.06063	0.553726
		0.448264	0.248729	1.07258	0.555332
		0.448412	0.251417	1.09854	0.558184
		0.448829	0.252307	1.10166	0.600146
		0.453052	0.254173	1.11113	0.612799
		0.460432	0.254266	1.14476	0.622591
		0.463538	0.255279	1.16498	0.628093
		0.464802	0.255911	1.16809	0.647554
		0.477909	0.260218	1.20917	0.693728
		0.481918	0.26023	1.22798	0.742093
		0.494104	0.26106	1.23935	0.784929
		0.495221	0.261204	1.26644	0.799604
		0.497045	0.262674	1.29897	0.811139
		0.49832	0.264211	1.32081	0.82791
		0.506098	0.265439	1.32537	0.838373
		0.515523	0.26614	1.34808	0.855579
		0.519714	0.269178	1.36514	0.873148
		0.521438	0.26961	1.40187	0.888112
		0.525604	0.27032	1.41192	0.899348
		0.529071	0.270677	1.41953	0.923538
		0.532082	0.270932	1.44861	0.944846
		0.534494	0.272726	1.4559	0.954542
		0.540007	0.274191	1.50187	0.970862
		0.546901	0.274338	1.53576	0.99555
		0.54879	0.274745	1.6097	0.997675
		0.549764	0.275582	1.62551	1.00584
		0.550057	0.276011	1.633	1.0277
		0.551866	0.276322	1.6969	1.03551
		0.552315	0.279882	1.73961	1.04228
		0.556001	0.281467	1.83174	1.0727
		0.55687	0.282108	1.88464	1.09255
		0.559041	0.28305	1.93206	1.10705
		0.561965	0.284827	1.99098	1.11427
		0.573944	0.289844	2.16653	1.12899
		0.57546	0.291029	2.23466	1.13263
		0.576165	0.291165	2.31008	1.14004
		0.588232	0.293535	2.50867	1.15539
		0.589826	0.297393	2.55062	1.19286
		0.590843	0.298359	2.5906	1.19547
		0.592653	0.302348	2.72774	1.19852
		0.595463	0.302812	2.75756	1.20769
		0.604169	0.303034	2.84137	1.2521
		0.61115	0.303577	3.0352	1.25786
		0.619265	0.30367	3.89004	1.27978
		0.620539	0.30763	4.24922	1.32584
		0.621935	0.308984	4.36335	1.35862
		0.624654	0.309479	4.41019	1.36347
		0.632781	0.310599	4.94112	1.37452
		0.634772	0.31355	5.52582	1.37501
		0.635337	0.313707	5.77318	1.38312
		0.64052	0.314827	5.79977	1.46536
		0.648725	0.315264	5.97615	1.49533
		0.655962	0.316357	6.44606	1.50959
		0.665994	0.319078	7.00801	1.56029
		0.67098	0.320867	7.11932	1.62597
		0.673379	0.322373	7.26926	1.64826
		0.681659	0.323774	7.56192	1.66982
		0.695666	0.327882	7.59112	1.6748
		0.701962	0.329556	7.60814	1.72725
		0.718563	0.330851	7.64684	1.72997
		0.723625	0.338848	7.72595	1.86811
		0.733906	0.339182	7.78493	1.87234
		0.738112	0.342171	7.80237	1.90154
		0.748439	0.342639	7.83715	2.02709
		0.753668	0.346882	7.85493	2.08676
		0.754937	0.34873	7.96802	2.26469
		0.756709	0.34889	8.03585	2.29218
		0.760569	0.350412	8.33145	2.32443
		0.762339	0.351583	8.39356	2.42568
		0.76585	0.35179	8.47641	2.54586
		0.769304	0.352982	8.77088	2.6043
		0.775899	0.358716	9.06104	2.65597
		0.787097	0.359488	9.0875	2.9173
		0.787592	0.359791	9.66034	3.56981
		0.813126	0.360922	9.71296	3.68198
		0.823993	0.366475	9.74669	3.72208
		0.852326	0.368326	10.6048	4.6552
		0.854985	0.371986	10.6156	4.94646
		0.867563	0.372678	10.6326	4.97822
		0.881704	0.374527	10.9075	5.20246
		0.885763	0.380968	11.3938	5.24973
		0.887326	0.38211	11.6528	5.33664
		0.889216	0.387302	11.8577	5.67323
		0.899976	0.390637	11.9294	5.91697
		0.921429	0.392884	12.2675	6.18777
		0.924595	0.398211	12.2857	6.28848
		0.924832	0.400484	12.4343	6.84369
		0.932802	0.40133	12.5893	6.89451
		0.935858	0.404304	14.0589	7.75021
		0.943784	0.411666		7.79609
		0.974903	0.412534		7.97818
		0.99852	0.420837		8.48896
		1.00646	0.422981		8.733
		1.03873	0.434383		8.83714
		1.04128	0.435384		8.87801
		1.05971	0.443548		9.18014
		1.10643	0.444093		9.70975
		1.20703	0.446451		9.71314
		1.2216	0.461959		10.0578
		1.2221	0.463748		10.3701
		1.45041	0.46714		10.3785
		1.47961	0.467874		10.9606
		1.48904	0.474599		11.0116
		1.61224	0.47522		11.2993
		1.63504	0.477271		11.6382
		1.72339	0.484296		13.0261
		1.74295	0.485341
		1.83124	0.490833
		2.04584	0.501863
		2.14264	0.504061
		2.31282	0.504776
		2.36362	0.508359
		2.37381	0.510447
		2.42698	0.513476
		2.56144	0.514294
		2.77464	0.514363
		2.8944	0.516818
		2.93062	0.517353
		2.94228	0.519537
		2.9585	0.529378
		2.96124	0.532612
		3.09499	0.533803
		3.27372	0.535038
		3.29802	0.535884
		3.31683	0.536513
		3.59704	0.542624
		3.59936	0.544678
		3.59956	0.544739
		3.64776	0.548635
		3.73068	0.564308
		3.87644	0.572077
		4.03499	0.57532
		4.2781	0.586295
		4.29228	0.588457
		4.3171	0.596074
		4.4628	0.597331
		4.61188	0.597741
		4.7223	0.603631
		4.84932	0.609781
		4.87012	0.614822
		4.97742	0.616441
		4.99397	0.617048
		5.17481	0.619536
		5.31806	0.619986
		5.54146	0.620031
		5.90556	0.626507
		6.08433	0.628121
		6.11841	0.639252
		6.39998	0.641054
		6.58991	0.644931
		6.66717	0.653369
		7.35606	0.657467
		7.99898	0.662488
			0.670617
			0.676806
			0.711886
			0.722472
			0.724904
			0.727788
			0.732886
			0.733669
			0.737886
			0.749682
			0.754712
			0.762855
			0.763104
			0.766009
			0.770223
			0.772651
			0.78537
			0.787259
			0.788144
			0.789399
			0.799734
			0.801193
			0.830011
			0.830444
			0.831175
			0.851828
			0.859648
			0.863618
			0.870526
			0.880697
			0.880851
			0.907681
			0.92608
			0.928169
			0.930098
			0.955263
			0.955992
			0.961418
			0.976988
			0.989222
			1.02895
			1.04974
			1.05236
			1.05693
			1.10235
			1.12365
			1.12929
			1.1469
			1.20772
			1.21363
			1.22881
			1.32113
			1.34564
			1.40728
			1.4387
			1.46633
			1.48037
			1.51656
			1.62299
			1.6735
			1.90221
			2.13066
			2.4583
			3.04876
			3.21305
			3.27524
			3.42103
			3.7869
			3.89132
			4.35444
			5.27034
			6.45292

## Sheet: Fig. 2D
Fig. 2D
Number of receiving cells
		WT	IRSp534K-GFP	Wnt3	Wnt3 + IRSp534K-GFP			Relative cell numbers (compared to WT)
		1.12936	0.780287	1.2115	1.0883
		0.944559	0.513347	1.10883	1.37577
		0.698152	0.513347	1.60164	1.58111
		0.759754	0.616016	1.70431	1.0883
		0.595483	0.533881	1.35524	0.944559
		1.17043	0.574949	2.23819	0.821355
		1.10883	0.533881	1.45791	1.23203
		0.903491	0.759754	1.3963	1.25257
		0.944559	0.533881	2.03285	0.924025
		0.924025	0.677618	1.60164	1.19097
		1.00616	1.2115	1.51951	0.859107
		1.02669	0.759754	1.86858	0.893471
		1.37577	0.800821	1.12936	1.30584
		0.800821	0.821355	1.51951	0.962199
		0.965092	1.0883	1.25257	1.09966
		0.657084	0.862423	1.35524	1.51203
		1.02669	1.19097	1.19097	1.27148
		0.985626	0.882957	1.93018
		1.1499	0.903491	1.56057
		1.47844	1.74538	1.23711
		1.10883	0.985626	1.34021
		0.882957	1.0883	1.20275
		1.3347	0.882957	1.37457
		0.821355	1.10883	1.34021
		1.41684	0.63655	1.13402
		1.00616	0.800821	1.03093
		0.780287		1.06529
		1.00616
		1.00029	0.83873	1.43556	1.14134

## Sheet: Fig. 2F
Figure 2F
BrdU Assay
	Control	IRSp534K	Wnt3	IRSp534K + Wnt3
	35.955	26.425	48.571	49.383
	50	37.647	56.931	45.455
	41.53	35.714	49	48.77
	44.371	25.926	45.509	48
	47.458	22.424	51.98	44.279
	41.1	43.103	50.237	59.2
	40.909	44.019	49.359	52.604
	50.926	45.213	59.887	50.794
	42.202	40.426	43.262	46.626
	46.774	32.184	47.191	58.192
	39.161	31.073	46.269	50.562
	49.58	27.586	52	38
	29.293	41.406	53.552	42.331
	34.831	39.231	51.63	39.759
	35.821	48.171	51.064	46.341
	41.304	34.94	47.328	35.294
	44.355	41.216	46.988	41.86
	51.316	40.179	51.807	44.828
	47.2	45.27	49.153	52.294
	43.066	41.414	50	49.18
