# Supplementary material for: The scaffolding protein flot2 promotes cytoneme-based transport of wnt3 in gastric cancer
Source: eLife. 2022 Aug 30;11:e77376. doi: 10.7554/eLife.77376 (PMC9457691; doi:10.7554/eLife.77376)
Supplement: Figure 3—figure supplement 1—source data 1. [file elife-77376-fig3-figsupp1-data1.xlsx]

## Sheet: Fig. 3-supplement Fig. 1B
Figure 3B
Autocrine TCF Reporter Fluorescence
	WT	FLOT2-GFP	∆N-FLOT2-GFP
	755.669	1094.96	339.269
	527.185	331.943	371.868
	116.772	143.918	345.464
	2297.2	100.916	257.854
	1364.58	141.41	359.519
	1071.09	461.613	549.098
	1225.7	172.828	527.981
	191.856	213.491	349.938
	198.686	245.733	357.324
	170.298	271.575	659.394
	517.629	187.103	553.181
	1387.03	216.246	486.536
	2527.59	261.07	1944.93
	1590.82	351.168	6976.01
	191.146	222.382	4769.11
	131.717	125.769	2063.21
	152.342	91.865	1790.67
	219.175	67.7585	1149.28
	172.811	1054.13	1423.59
	1206.54	1174.18	1056.62
	141.39	617.474	616.834
	741.999	183.704	898.85
	856.83	210.476	949.368
	279.06	142.351	758.296
	488.587	79.426	1147.58
	612.517	440.587	1084.64
	505.799	1867.65	4065.94
	904.136	122.307	4184.19
	177.762	154.064	851.451
	289.656	160.27	867.808
	3467.38	194.966	533.468
	3574.21	137.046	361.689
	448.379	1891.75	328.64
	1685.8	318.977	9926.01
	288.049	443.562	4081.74
	4802	134.939	1641.96
	310.115	103.257	464.432
	709.262	1896.51	555.169
	507.56	5386.22	1221.94
	567.306	2270.97	585.994
	1135.25	667.512	378.116
	316.316	677.148	2073.14
	756.484	439.329	1496.31
	1124.09	322.625	1441.78
	649.945	168.344	1295.14
	1230.16	175.107	3706.16
	1088.97	447.552	506.751
	685.995	160.231	708.507
	4715.01	179.277	876.79
	403.475	132.294	1594.53
	354.841	149.645	868.107
	304.591	149.233	795.33
	253.8	371.086	1149.03
	727.555	145.008	1248.85
	405.365	119.96	2270.93
	394.579	132.857	1429.44
	1369.03	326.642	11671
	1315.64	179.565	3305.36
	752.555	191.431	4000.54
	4750.61	174.035	1076.19
	330.184	166.234	3207.85
	687.18	185.06	1223.34
	348.096	230.056	571.906
	632.156	223.772	672.392
	1098.49	201.053	1689.38
	560.316	145.734	2915.69
	504.369	183.264	4812.99
	497.315	77.033	3075.21
	465.66	204.327	1888.42
	205.094	94.9395	1403.83
	1716.36	718.718	1192.93
	3159.72	782.14	1097.59
	1390.19	381.166	1160.46
	296.67	428.622	1164.68
	572.967	321.242	636.739
	286.484	726.866	601.627
	1464.25	3723.56	759.713
	3114.54	1334.46	6139.13
	2069.72	435.163	2818.44
	315.562	444.404	1058.11
	745.383	850.648	1872.06
	914.956	1015.26	823.556
	221.8	156.144	534.784
	298.879	1816.99	544.031
	1752.09	1392.92	437.437
	955.981	236.586	634.202
	985.294	192.174	434.349
	2827.37	396.619	1864.25
	263.702	327.979	876.276
	2688.38	118.317	497.065
	567.81	188.645	1098.05
	972.468	747.349	1979.44
	885.943	611.832	2118.75
	336.488	436.82	1204.12
	1746.04	480.026	996.879
	2205.68	179.645	1091.58
	497.307	141.673	657.128
	219.144	169.375	658.667
	274.387	230.523	980.731
	3731.49	124.537	893.959
	783.169	293.147	1667.88
	297.4	134.173	1639.86
	2368.82	98.459	1790.57
	758.632	141.332	881.725
	791.033	1044.18	2265.88
	250.516	878.138	9738.5
	1196.76	929.181	6898.95
	501.932	1197.55	7248.92
	1145.98	1060.33	4460.39
	191.509	857.829	1732.34
	1545.16	2225.07	2399.95
	3802.19	2096.22	1159.56
	2729.12	2456.73	1186.99
	5876.5	1022.74	579.236
	757.772	6520.42	383.578
	718.37	3842.62	381.396
	1637.3	10058.7	293.375
	2573.65	1181.6	279.303
	644.38	540.545	346.744
	648.141	447.185	7333.61
	633.731	324.727	3177.42
	519.895	315.731	7566.19
	1046.75	353.194	4273.7
	213.542	561.148	2822.49
	264.909	478.473	2936.11
	293.117	1242.36	2647.24
	419.318	982.654	2415.67
	554.855	912.212	2049.6
	553.959	271.726	1858.13
	658.408	326.301	2037.93
	478.819	2450.58	1049.12
	348.963	396.706	923.268
	1138.3	987.604	791.178
	2224.54	1062.73	717.903
	3285.97	637.572	1522.49
	2452.83	300.653	1067.25
	3998.01	557.569	2184.39
	1309.84	540.98	353.283
	1085.75	494.055	323.809
	2050.09	453.635	250.06
	849.768	836.778	723.026
	2031.41	1488.56	633.663
	3329.01	540.726	328.107
	1542.9	1184.41	343.134
	1498.35	425.24	919.24
	2665.67	257.462	1327.51
	1469.22	427.097	2454.78
	3413.34	264.995	2753.53
	836.557	261.749	613.094
	632.953	256.716	558.461
	1351.9	907.345	549.946
	408.541	367.46	553.208
	489.207	208.866	458.102
	397.344	167.657	245.515
	945.975	247.406	423.234
	338.424	186.709	214.101
	348.396	177.364	206.307
	887.112	843.918	451.305
	323.571	941.416	495.598
	1119.6	779.089	962.212
	547.86	2726.9	1276.95
	338.533	633.164	333.074
	1817.34	400.448	818.325
	568.963	499.022	1407.18
	445.42	1708.49	294.921
	471.37	426.959	329.16
	2051.34	424.486	722.129
	746.871	4842.61	522.026
	619.638	3592.94	686.609
	433.144	4117.24	1106.4
	372.814	1677.57	1256.02
	1124.32	1456.03	625.324
	504.561	1901.56	1076.44
	1076.58	993.352	713.207
	992.97	886.906	1635.12
	718.796	1235.38	869.233
	816.885	1614.85	986.752
	1069.25	2702.91	608.467
	952.744	1249.54	7534.87
	831.864	1069.94	5306.98
	634.983	1081.11	10895
	1374.38	995.237	4697.45
	4058.24	1193.64	4275.68
	1280.61	1103.9	5438.14
	1537.98	923.527	6699.85
	1442.64	1233.1	6911.06
	1499.35	1391.35	1034.85
	1228.38	741.221	648.244
	2585.79	577.33	647.176
	4037.3	622.206	742.408
	674.986	1242.34	551.643
	1029.62	1122.45	846.57
	1198.59	992.909	1105.98
	733.193	740.838	786.443
	606.478	225.627	476.503
	2235.47	301.184	200.15
	1356.66	327.742	1572.4
	1080.32	188.818	1727.49
	2402.27	227.022	1961.1
	2967.72	219.737	173.623
	1427.66	1214.17	163.968
	2060.47	590.766	321.643
	3758.82	242.219	700.227
	2456.39	477.202	733.522
	1270.18	211.363	478.226
	829.148	215.12	250.433
	369.357	261.836	316.256
	2097.38	224.901	855.965
	603.309	220.702	505.053
	434.437	368.344	531.331
	464.711	206.843	281.005
	570.357	207.923	1295.81
	330.506		552.883
	307.717	886.727	562.878
	560.982	1007.84	1132.64
	274.574	275.589	313.09
	978.303	294.065	449.833
	6332.01	320.151	3876.87
	8347.55	291.305	3335.97
	9915.53	414.85	741.427
	4018.45	666.176	762.527
	2843.45	427.066	887.253
	1732.81	496.307	886.52
	679.775	300.721	1915.87
	1116.05	247.641	735.699
	3456.51	535.768	794.72
	582.84	1118.63	870.027
	921.002	1100.23	256.145
	242.809	497.732	321.581
	233.307	831.589	259.153
	1182.11	840.995	1260.39
	5042.69	1394.43	1007.22
	6385.97	535.309	757.405
	4764.51	268.596	1009.1
	3402.78	302.329	958.814
	2234.24	264.627	795.036
	1301.36	196.722	663.406
	2089.69	187.786	878.463
	1916.34	179.284	194.713
	1904.93	1219.92	200.232
	1285.92	254.143	1359.58
	767.716	331.153	1902.91
	699.057	1247.6	1134.82
	954.514	570.289	314.165
	782.421	487.389	803.441
	1518.42	614.848	350.917
	1151.75	570.526	327.87
	1382.78	389.107	314.665
	1553.86	388.483	1063.9
	587.397	356.341	1294.15
	916.062	225.702	1181.88
	1526.54	581.961	718.99
	1311.99	554.804	829.105
	1031.31	532.183	684.967
	1322.08	486.297	829.933
	1138.92	656.342	912.811
	1235.31	457.829	750.077
	400.865	271.193	533.992
	167.511	579.761	408.708
	141.16	225.899	670.561
	221.511	229.017	463.665
	199.316	107.578	1404.76
	199.242	105.606	942.11
	1384.85	127.785	1577.84
	475.27	188.655	1237.22
	597.548	390.606	796.357
	496.737	703.059	1255.66
	898.197	756.262	928.054
	299.141	758.716	853.163
	427.042	896.913
	320.687	331.291
	196.188	276.135
	161.934	110.429
	209.857	117.954
	331.888	108.791
	295.814	339.31
	207.431	152.389
	299.524	141.339
	3500.29	156.957
	8795.72	186.646
	5116.22	1668.33
	5767.9	1819.53
	6798.52	570.902
	5550.98	1170.61
	1718.03	454.648
	489.312	288.861
	511.037	288.543
	1726.93	514.143
	1862.28	731.442
	868.338	163.841
	1695.1	169.417
	962.205	156.691
	1017.19	592.359
	1099.27	689.499
	2055.19	1540.34
	7056.59	632.12
	4999.02	1479.18
	7634.06	245.863
	5027.84	741.067
	3877.31	239.542
	3185.17	183.278
	7534.92	240.88
	3893.51	356.125
	1639.33	283.708
	5724.72	683.327
	5443.03	174.015
	5635.91	188.938
	9710.19	87.3345
	3855.37	127.483
	2909.19	113.178
	2771.49	312.084
	399.031	370.927
	485.064	263.592
	303.309	350.958
	425.773	840.94
	371.262	338.378
	323.721	247.462
	296.118	666.049
	388.197	788.408
	4572.24	560.643
	2559.34	189.026
	2763.03	181.661
	2106.07	418.664
	1843.87	290.739
	462.828	299.952
	420.191	244.377
	344.96	598.553
	167.356	423.22
	646.611	211.718
	599.764	862.927
	836.278	903.86
	406.602	741.528
	478.481	403.175
	4571.7	294.035
	2906.32	342.097
	1429.05	384.443
	1988.77	323.92
	1717.64	298.851
	2041.7	289.058
	640.482	922.527
	521.861	667.432
	1072.31	400.389
	852.52	515.936
	572.792	834.914
	583.78	934.762
	8205.39	672.982
	3021.5	526.943
	3846.01	468.278
	5824.28	1100.93
	1046.72	424.993
	1169.93	970.63
	1266.41	1282.1
	1437.15	967.524
	1116.34	544.685
	1319.25	552.696
	1340.88	607.572
	1065.86	566.34
	1058.75	338.132
	1184.8	250.169
	1076.44	278.058
	1735.2
	1511.92
	1165.05
	1045.5
	1440.86
	200.274
	207.104
	134.685
	143.159
	3571.51
	3532.42
	1489.99
	1637.7
	854.34
	878.081
	526.027
	561.783
	1034.17
	957.873
	487.976
	402.98
	693.31
	6358.95
	2595.42
	3283.08
	1230.18
	1436.61
	2257.54
	1484.86
	2858.64
	1585.1
	1064.88
	3781.6
	3391.42
	1312.54
	1448.9
	1265.07
	3230.72
	1317.23
	2459.8
	1285.89
	1309.65
	903.346
	279.583
	272.65
	317.348

## Sheet: Fig. 3-supplement Fig. 1C
Supp. Fig. 3C
Average filopodia length
		Filopodia length
		WT	Flot2-GFP	∆N-Flot2-GFP
		4.14073	17.5258	4.1165
		3.91028	16.739	3.3992
		6.0302	3.71978	4.53157
		3.1482	5.63743	3.568
		3.863	7.77233	3.493
		3.74462	4.72262	3.611
		5.11422	6.39117	4.39644
		4.80425	5.3097	4.06775
		4.36273	4.47678	4.8194
		4.531	5.00738	5.04025
		4.54471	8.68786	4.03367
		5.1311	9.95136	5.08175
		5.02967	6.08524	4.369
		4.66044	7.58	5.2735
		6.56957	5.46605
		5.1946	6.30871
		5.69437	7.11554
			5.88409
			8.5072
			5.84344
		4.73375	7.43657	4.2715
