# Supplementary material for: The scaffolding protein flot2 promotes cytoneme-based transport of wnt3 in gastric cancer
Source: eLife. 2022 Aug 30;11:e77376. doi: 10.7554/eLife.77376 (PMC9457691; doi:10.7554/eLife.77376)
Supplement: Figure 3—source data 1. — Beta-actin was used as the loading control. [file elife-77376-fig3-data1.xlsx]

## Sheet: Fig. 3A
Figure 3A
RT-qPCR Data
	GAPDH
		Ct Values (1/10 dilution)				Mean Ct Values	Standard Dev	Delta Ct
	Cell Line	Rep. 1	Rep. 2	Rep. 3	Rep. 4
	HFE-145	13.4638	15.347	16.4785	14.4654	14.9387	1.28282	0
	AGS	14.457	16.7327	16.1714	15.1094	15.6177	1.02558	-0.678973
	MKN28		15.7868	14.6269	14.0944	14.836	0.865386	0.102638
	MKN7		15.1776	14.9754	14.8558	15.0029	0.162662	-0.0642598
	Flot2
		Ct Values (1/10 dilution)				Mean Ct Values	Standard Dev	Delta Ct	Fold Change
	Cell Line	Rep. 1	Rep. 2	Rep. 3	Rep. 4
	HFE-145	19.8064	19.8948	20.0975	18.7494	19.637	0.604152	0	1
	AGS	19.3966	19.9149	19.3778	18.4181	19.2769	0.624256	0.360148	2.13014
	MKN28		19.8594	20.3783	18.3436	19.5271	1.05727	0.109903	1.00686
	MKN7		19.3688	19.6577	18.2685	19.0983	0.732984	0.538681	1.55821
	Fold changes calculated using Pfaffl Equation and relative to GAPDH loading control

## Sheet: Fig. 3A (2)
Figure 3A
Western Blot Data

## Sheet: Fig. 3C, D
Figure 1B
Filopodia Quantifications
Average
			HFE						AGS
	Cumulative Length						Cumulative Length
	WT	Ctrl siRNA	Flot2-GFP	∆N-Flot2-GFP	Flot2 siRNA		WT	Ctrl siRNA	Flot2-GFP	∆N-Flot2-GFP	Flot2 siRNA
	104.573	135.448	379.638	20.767	62.731		130.549	169.585	152.958	60.76	150.963
	118.513	112.851	246.958	11.664	91.821		110.783	266.203	201.048	42.144	55.027
	71.303	106.117	180.861	29.113	81.767		124.483	227.045	248.772	58.698	136.218
	49.143	93.224	429.104	74.472	106.263		259.421	326.204	306.876	82.424	80.003
	115.049	79.058	300.166	14.352	68.721		220.561	133.201	463.872	70.288	52.368
	83.193	73.916	281.391	18.64	75.026		487.63	402.86	440.937	8.583	121.317
	94.325	117.237	195.931	30.635	143.424		335.892	220.48	137.39	102.01	101.473
	82.221	54.495	415.926	50.421	164.352		332.484	377.629	281.632	26.212	171.683
	93.568	110.406	419.24	26.752	106.638		294.43	178.021	240.107	33.151	72.19
	91.731	115.038	153.894	38.09	80.116		187.643	150.151	389.097	30.186	155.602
	64.105	57.262	331.852	80.313	68.658		137.348	344.208	290.999	90.569	74.775
	77.827	117.21	377.703	40.908	74.595		153.537	133.02	464.457	53.208	40.612
	82.824	88.8	248.526	17.353	100.398		114.412	287.674	1117.12	40.259	224.5
	116.637	50.552	223.003	46.073	90.59		157.094	302.89	427.017	32.617	94.999
	166.215	111.008	212.805	106.777	145.576		432.001	301.561	294.04	55.821	118.556
	41.137	58.26	156.897	32.595	74.189		232.771	436.418	361.211	28.166	45.74
	119.352	62.302	212.617	44.152	89.878		288.213	151.308	602.035	23.453	85.101
	98.151	71.464	226.306	38.927	48.343		207.79	116.275	229.185	68.008	308.122
	110.345	137.609	118.772	22.293	16.472		157.416	232.495	571.962	85.703	85.924
	84.568		304.291	47.727	29.476		101.464	202.797	523.36	63.75	229.99
	117.695		489.553	31.818	70.911		120.454	196.657	595.728	76.133	65.146
	100.306		393.448	23.59	38.589		387.968		283.119	92.127	218.02
			372.47	15.196	41.118		275.682		180.717	61.647	64.118
			508.885		17.227		238.396		303.482	72.812	108.25
			401.982				166.633		324.63	41.877	96.119
Average	94.6719	92.2241	286.313	37.5056	78.62		226.202	245.556	377.27	56.0242	118.273
			HFE						AGS
	Filopodia Number						Filopodia Number
	WT	Ctrl siRNA	Flot2-GFP	∆N-Flot2-GFP	Flot2 siRNA		WT	Ctrl siRNA	Flot2-GFP	∆N-Flot2-GFP	Flot2 siRNA
	36	43	73	15	31		21	37	28	40	49
	35	36	61	8	35		21	57	60	20	25
	24	32	39	16	27		30	47	82	25	45
	24	34	117	37	46		51	63	129	27	39
	35	34	91	9	43		37	31	106	31	29
	42	24	73	10	39		71	48	34	6	30
	31	29	58	14	52		62	36	69	51	33
	37	33	66	32	47		62	48	96	17	83
	34	35	71	17	49		48	36	65	15	33
	30	39	52	24	37		50	49	101	16	59
	23	25	81	44	36		24	43	96	41	38
	25	47	94	22	44		44	37	75	36	20
	28	35	65	12	44		34	55	125	13	59
	48	25	67	23	47		44	58	84	16	44
	63	33	74	55	54		78	51	85	19	32
	21	21	64	16	31		30	55	85	15	20
	46	23	90	19	39		42	46	67	10	24
	30	25	72	18	20		44	30	75	24	52
	40	41	42	12	9		33	39	104	38	37
	34		57	30	13		24	37	73	25	75
	32		98	18	26		25	50	117	19	27
	29		96	14	21		67		47	28	65
			53	9	25		54		72	28	42
			126		10		56		97	30	62
			107				33		34	14	41
Average	33.9545	32.3158	72.7727	20.6087	34.375		43.4	45.381	80.24	24.16	42.52

## Sheet: Fig. 3E
Fig. 3E
Filopodia distributions (percentages)
			HFE						AGS
		Length (um)	WT	Control siRNA	Flot2-GFP	ΔN-Flot2-GFP	Flot2 siRNA		WT	Control siRNA	Flot2-GFP	ΔN-Flot2-GFP	Flot2 siRNA
		L < 2um	38.4289	40.4187	22.6195	73.0523	56.0206		14.0481	17.1001	30.2448	54.7483	43.4167
		2 < L < 4	44.1825	40.7767	43.4473	23.8044	35.4112		37.5613	41.1064	33.2294	33.4881	40.0395
		4 < L < 6	11.6035	12.5645	19.0549	2.68126	7.26451		20.0475	18.9248	11.9655	8.37747	10.8081
		6 < L < 8	3.50692	4.32519	7.21701	0.210526	0.972413		9.69561	7.31392	7.62352	1.61398	3.91169
		8 < L < 10	1.89185	0.95633	3.12605	0	0.0740741		6.51844	4.02078	5.00723	1.00582	1.05791
		10 < L	0.38641	0.958612	4.56941	0	0.257169		10.9264	11.6663	11.9232	0.766339	0.733458
