# Supplementary material for: The scaffolding protein flot2 promotes cytoneme-based transport of wnt3 in gastric cancer
Source: eLife. 2022 Aug 30;11:e77376. doi: 10.7554/eLife.77376 (PMC9457691; doi:10.7554/eLife.77376)
Supplement: Figure 4—source data 1. [file elife-77376-fig4-data1.xlsx]

## Sheet: Fig. 4F
Figure 4C
Paracrine TCF Reporter Quantifications (relative)
	Control	FLOT2	∆N-FLOT2	Wnt3	Wnt3 + FLOT2	Wnt3 + ∆N-FLOT2	Wnt3 + FLOT2 + IRSp534K
	0.104636	0.0824362	0.0821158	0.121464	0.114122	0.0881482	0.0751356		Categorised by value (ascending)
	0.10585	0.0881061	0.0848886	0.124494	0.120537	0.0917717	0.0809116
	0.108284	0.0885583	0.0850905	0.126008	0.143444	0.0970575	0.0886793
	0.108863	0.0897742	0.0853809	0.126016	0.146838	0.100365	0.0922642
	0.112324	0.0923094	0.0874165	0.13022	0.154123	0.100721	0.111787
	0.121636	0.142524	0.091985	0.13531	0.161142	0.107699	0.113806
	0.124489	0.146613	0.0933728	0.143535	0.16162	0.109045	0.123375
	0.129049	0.147356	0.0943084	0.146857	0.161693	0.109829	0.127673
	0.131935	0.151833	0.0949146	0.158709	0.162759	0.110003	0.131687
	0.151916	0.157451	0.0952148	0.160822	0.164549	0.110112	0.132087
	0.153995	0.164576	0.0952986	0.161993	0.170184	0.113177	0.137778
	0.157011	0.164597	0.0976961	0.162535	0.17038	0.115156	0.139584
	0.168473	0.166892	0.108368	0.164387	0.177083	0.120325	0.142781
	0.170206	0.167758	0.109366	0.165157	0.183041	0.121301	0.143374
	0.170955	0.16929	0.111858	0.167142	0.183822	0.122371	0.15127
	0.171307	0.169409	0.112223	0.168309	0.185406	0.12732	0.151679
	0.173846	0.170273	0.115317	0.168901	0.186388	0.131475	0.152157
	0.190049	0.171062	0.118192	0.169902	0.186524	0.131807	0.155719
	0.192182	0.171764	0.118286	0.171878	0.187042	0.135354	0.157988
	0.192624	0.173324	0.118593	0.172104	0.196095	0.136066	0.168359
	0.206427	0.174309	0.119194	0.173496	0.197892	0.13843	0.169954
	0.211895	0.175082	0.119896	0.174012	0.198768	0.139265	0.170622
	0.213771	0.175175	0.121512	0.174122	0.206866	0.140195	0.173815
	0.216995	0.177505	0.12623	0.17538	0.209267	0.140424	0.184608
	0.217393	0.177675	0.127585	0.177459	0.209434	0.14371	0.185225
	0.21906	0.178756	0.129329	0.179377	0.211709	0.144657	0.185741
	0.222801	0.18033	0.129656	0.17962	0.221974	0.147557	0.188306
	0.223074	0.183393	0.131546	0.187868	0.223512	0.148715	0.188593
	0.226614	0.184905	0.131684	0.195106	0.231571	0.151794	0.190748
	0.227003	0.185957	0.132431	0.195848	0.232864	0.155377	0.190867
	0.228574	0.186819	0.132458	0.197471	0.23318	0.156325	0.19283
	0.229719	0.188363	0.133458	0.197736	0.240757	0.158328	0.195541
	0.23463	0.188583	0.134455	0.198234	0.240786	0.161456	0.198456
	0.235168	0.18976	0.134882	0.199687	0.242534	0.164678	0.199836
	0.239329	0.190443	0.135596	0.199815	0.243963	0.165143	0.201786
	0.242063	0.190964	0.135875	0.202437	0.244385	0.165425	0.20477
	0.242108	0.192577	0.136776	0.20474	0.245367	0.166012	0.205555
	0.242753	0.201616	0.137119	0.206892	0.246225	0.168023	0.205809
	0.244104	0.207215	0.137481	0.207279	0.247878	0.168572	0.20665
	0.24443	0.208215	0.13799	0.208412	0.249917	0.168848	0.206858
	0.24491	0.209492	0.138227	0.21019	0.254541	0.169398	0.209749
	0.245354	0.212913	0.138284	0.21068	0.257735	0.170506	0.210051
	0.246193	0.214767	0.139412	0.212416	0.257747	0.173408	0.210475
	0.24682	0.216843	0.139987	0.212502	0.258057	0.174525	0.21229
	0.249084	0.219589	0.140354	0.213975	0.25931	0.174735	0.213346
	0.24912	0.220698	0.140383	0.216115	0.263412	0.175314	0.21393
	0.252372	0.220785	0.141425	0.216431	0.265838	0.178066	0.214674
	0.253618	0.221408	0.141983	0.217147	0.266471	0.178102	0.215088
	0.255712	0.225221	0.142003	0.217337	0.269546	0.178581	0.215497
	0.258798	0.228948	0.142524	0.217634	0.270087	0.179476	0.219969
	0.259042	0.229217	0.142596	0.217766	0.271198	0.181764	0.223319
	0.259081	0.229348	0.142695	0.219197	0.27424	0.182075	0.224772
	0.261303	0.230188	0.142803	0.219455	0.275021	0.185401	0.225143
	0.261315	0.235145	0.143695	0.220862	0.275189	0.186731	0.227437
	0.262389	0.237133	0.143965	0.221436	0.276095	0.187102	0.228776
	0.263078	0.237318	0.14455	0.222324	0.278296	0.188345	0.229063
	0.264901	0.237825	0.146663	0.223377	0.27909	0.19143	0.229914
	0.269087	0.239683	0.147203	0.223777	0.284445	0.195279	0.232108
	0.270516	0.240601	0.148497	0.224603	0.287834	0.196276	0.233205
	0.271242	0.240681	0.149102	0.225391	0.291678	0.199263	0.233622
	0.273031	0.241894	0.152694	0.225809	0.292807	0.201918	0.234146
	0.27519	0.245608	0.1531	0.226407	0.293375	0.206368	0.234919
	0.275284	0.247703	0.153311	0.226731	0.296397	0.209829	0.235015
	0.276766	0.250347	0.153319	0.228854	0.296418	0.21227	0.235949
	0.280223	0.250625	0.153366	0.229736	0.296954	0.213313	0.235983
	0.280525	0.250689	0.154471	0.231141	0.301334	0.219918	0.236545
	0.281217	0.250702	0.154613	0.231301	0.304682	0.225695	0.237684
	0.283519	0.250837	0.155912	0.232041	0.305882	0.226373	0.240513
	0.284916	0.251404	0.155953	0.233113	0.308969	0.229309	0.242767
	0.286788	0.251554	0.157486	0.238032	0.309433	0.231994	0.242794
	0.287761	0.251768	0.159088	0.238482	0.310903	0.235475	0.244324
	0.289878	0.253315	0.161142	0.241366	0.311486	0.235529	0.245009
	0.292176	0.253647	0.162371	0.241655	0.311821	0.237138	0.24769
	0.292623	0.254216	0.164347	0.249334	0.313085	0.238211	0.248088
	0.294204	0.254404	0.168596	0.252078	0.315472	0.242182	0.249574
	0.296019	0.254837	0.171682	0.252264	0.315901	0.243626	0.250325
	0.297166	0.256699	0.172003	0.25286	0.316951	0.248864	0.250845
	0.299261	0.258306	0.172148	0.259881	0.318224	0.249106	0.251917
	0.300132	0.258449	0.172686	0.264033	0.320819	0.249113	0.251966
	0.303449	0.259965	0.173906	0.264241	0.322921	0.249337	0.254573
	0.303735	0.262518	0.176097	0.264787	0.325149	0.251068	0.265531
	0.306262	0.262623	0.178162	0.268094	0.325252	0.252545	0.272943
	0.307642	0.264084	0.179706	0.268617	0.326246	0.254423	0.273896
	0.307664	0.265113	0.180558	0.269931	0.326472	0.255201	0.274493
	0.311817	0.26521	0.182274	0.27024	0.334756	0.257619	0.278134
	0.312231	0.268447	0.182599	0.271405	0.336277	0.258488	0.279508
	0.313806	0.269552	0.182966	0.271502	0.336528	0.258625	0.286352
	0.315896	0.270059	0.184817	0.277073	0.339778	0.260325	0.289391
	0.31706	0.270094	0.186692	0.280725	0.340638	0.261876	0.290836
	0.320267	0.270667	0.188396	0.282138	0.342717	0.26233	0.292091
	0.32218	0.2717	0.188477	0.292481	0.343303	0.263347	0.292618
	0.323685	0.272715	0.194779	0.30227	0.348107	0.263578	0.29277
	0.325247	0.274425	0.195588	0.302949	0.350451	0.263725	0.299327
	0.325545	0.279685	0.196016	0.308502	0.3511	0.265577	0.303588
	0.326164	0.28105	0.197793	0.309383	0.355416	0.265856	0.304296
	0.329479	0.281337	0.199856	0.310314	0.35668	0.267407	0.304325
	0.330658	0.282535	0.200495	0.310883	0.356765	0.267758	0.304665
	0.331275	0.28269	0.202512	0.310908	0.356839	0.26835	0.307573
	0.334156	0.282812	0.203147	0.31189	0.358161	0.269494	0.312144
	0.334508	0.284793	0.203282	0.315354	0.360355	0.272088	0.313886
	0.33694	0.284809	0.203549	0.324916	0.361592	0.273472	0.315564
	0.337275	0.285054	0.205057	0.325747	0.362975	0.276168	0.322903
	0.340519	0.285246	0.20664	0.33093	0.363345	0.276377	0.325327
	0.340812	0.285882	0.207067	0.33244	0.367617	0.277341	0.327731
	0.341441	0.286221	0.208007	0.336719	0.368605	0.280978	0.32851
	0.341808	0.287405	0.208943	0.337403	0.3689	0.284473	0.33117
	0.343024	0.28897	0.209506	0.345518	0.372274	0.287711	0.331179
	0.344425	0.289388	0.211966	0.350722	0.374509	0.289765	0.341541
	0.346692	0.29091	0.221816	0.359772	0.375402	0.293707	0.345856
	0.347714	0.291143	0.222167	0.362104	0.379161	0.294165	0.346616
	0.347885	0.297629	0.224262	0.36336	0.381356	0.29623	0.349589
	0.348016	0.297835	0.226429	0.369173	0.382908	0.309	0.353398
	0.348323	0.298464	0.226581	0.372853	0.384717	0.309159	0.370089
	0.351483	0.298583	0.22727	0.377757	0.385738	0.309497	0.37125
	0.353219	0.299079	0.229872	0.377993	0.389552	0.310364	0.373819
	0.35364	0.299202	0.230566	0.378213	0.393011	0.320741	0.378781
	0.356139	0.2997	0.232957	0.379575	0.396344	0.321863	0.38045
	0.35626	0.299718	0.235103	0.386282	0.396926	0.322585	0.381035
	0.356433	0.30008	0.235649	0.386661	0.401337	0.323348	0.382101
	0.360268	0.301058	0.23931	0.388073	0.405913	0.325222	0.383051
	0.361009	0.302628	0.240513	0.38905	0.406326	0.325782	0.387431
	0.361215	0.304031	0.245773	0.408167	0.410204	0.327746	0.388007
	0.361327	0.305182	0.245929	0.43916	0.411611	0.330757	0.391922
	0.362032	0.305306	0.247984	0.482369	0.417186	0.331137	0.392879
	0.364122	0.307417	0.248492	0.508915	0.420522	0.334699	0.396227
	0.36687	0.307979	0.250523	0.510555	0.423242	0.334997	0.396311
	0.370139	0.310097	0.250668	0.537505	0.423844	0.335108	0.404584
	0.371278	0.310977	0.251273	0.550995	0.427852	0.338298	0.408228
	0.372372	0.312921	0.253563	0.558592	0.4284	0.339657	0.410062
	0.372538	0.318471	0.254649	0.565889	0.431703	0.34039	0.416896
	0.372566	0.320692	0.254652	0.578019	0.435504	0.340842	0.41776
	0.372848	0.320719	0.254888	0.591071	0.447119	0.344547	0.436632
	0.373082	0.3216	0.255527	0.612568	0.448207	0.345692	0.44391
	0.375371	0.323341	0.257057	0.613677	0.449761	0.347743	0.451545
	0.377669	0.323371	0.257717	0.615807	0.45613	0.358665	0.458067
	0.380774	0.324932	0.259442	0.620107	0.460623	0.363425	0.461403
	0.385313	0.325511	0.259468	0.635501	0.46093	0.367417	0.470808
	0.385726	0.327103	0.260363	0.646545	0.473582	0.369695	0.471574
	0.3875	0.327931	0.262197	0.647106	0.477308	0.370964	0.475159
	0.38905	0.330801	0.262254	0.651917	0.482554	0.373228	0.475639
	0.389193	0.330811	0.262434	0.670706	0.491764	0.37428	0.482545
	0.389917	0.331481	0.262821	0.683953	0.493012	0.378893	0.486436
	0.390316	0.333814	0.264058	0.693919	0.499192	0.386542	0.503106
	0.390366	0.333941	0.264507	0.696107	0.499463	0.388699	0.52859
	0.391501	0.334494	0.26584	0.697534	0.500803	0.390466	0.530107
	0.393395	0.340604	0.266835	0.712871	0.504711	0.39074	0.534652
	0.396297	0.340705	0.266865	0.71968	0.512534	0.394035	0.544608
	0.403095	0.341143	0.268861	0.739333	0.514802	0.395697	0.546212
	0.403348	0.341191	0.270119	0.742263	0.520062	0.396529	0.550515
	0.405088	0.344607	0.271547	0.743164	0.521947	0.398885	0.552536
	0.405446	0.345921	0.272281	0.745965	0.522944	0.400064	0.55953
	0.405484	0.34595	0.273656	0.751132	0.526769	0.401229	0.559538
	0.405494	0.346739	0.274358	0.769136	0.537944	0.401543	0.566948
	0.406158	0.347982	0.277349	0.800875	0.539476	0.402147	0.582768
	0.40818	0.348458	0.27982	0.845527	0.545721	0.406589	0.584674
	0.408877	0.348645	0.280553	0.849505	0.549769	0.409398	0.594088
	0.410238	0.351558	0.281692	0.867085	0.554966	0.412131	0.621191
	0.412244	0.351732	0.283473	0.869487	0.58138	0.41482	0.641334
	0.417494	0.356927	0.283631	0.880377	0.596137	0.415105	0.657046
	0.417709	0.357983	0.284943	0.887352	0.596812	0.416525	0.669393
	0.418613	0.358149	0.285117	0.905046	0.598044	0.418731	0.680576
	0.42203	0.36071	0.285674	0.907315	0.598708	0.418868	0.701162
	0.423568	0.361603	0.28606	0.918629	0.605289	0.419417	0.702101
	0.427158	0.361919	0.287483	0.925003	0.606071	0.419614	0.705906
	0.433013	0.36371	0.287483	0.931653	0.611747	0.420724	0.723955
	0.435845	0.3647	0.288109	0.937442	0.637154	0.421582	0.737586
	0.436034	0.365153	0.288287	0.968921	0.641038	0.424608	0.738606
	0.437328	0.369323	0.289097	0.983595	0.642161	0.42498	0.738997
	0.439854	0.370741	0.289346	1.04937	0.646153	0.426378	0.746694
	0.444431	0.37099	0.289395	1.06063	0.655951	0.429961	0.766244
	0.448264	0.371862	0.290185	1.07258	0.663205	0.431789	0.775407
	0.448412	0.373676	0.29051	1.09854	0.687043	0.437252	0.797144
	0.448829	0.374483	0.291755	1.10166	0.693523	0.438815	0.816151
	0.453052	0.375919	0.292107	1.11113	0.700485	0.439801	0.837454
	0.460432	0.376139	0.292486	1.14476	0.703829	0.441441	0.842581
	0.463538	0.37703	0.293807	1.16498	0.704466	0.444737	0.847487
	0.464802	0.377995	0.294212	1.16809	0.715346	0.44649	0.875039
	0.477909	0.378396	0.297274	1.20917	0.721039	0.448513	0.921932
	0.481918	0.378713	0.302078	1.22798	0.726155	0.45207	0.946665
	0.494104	0.379636	0.303676	1.23935	0.752529	0.455389	0.961237
	0.495221	0.380895	0.304139	1.26644	0.754272	0.457712	0.96467
	0.497045	0.382128	0.305076	1.29897	0.768244	0.458008	0.98054
	0.49832	0.384063	0.306008	1.32081	0.774244	0.471135	1.01052
	0.506098	0.384142	0.306164	1.32537	0.796006	0.475291	1.02345
	0.515523	0.384994	0.306769	1.34808	0.802763	0.478777	1.04226
	0.519714	0.386218	0.306972	1.36514	0.806047	0.481422	1.04637
	0.521438	0.390371	0.307677	1.40187	0.825404	0.484174	1.06511
	0.525604	0.392889	0.31093	1.41192	0.834088	0.485425	1.0852
	0.529071	0.39373	0.313059	1.41953	0.842677	0.488785	1.08629
	0.532082	0.396624	0.313353	1.44861	0.869912	0.511136	1.09602
	0.534494	0.397778	0.313708	1.4559	0.872852	0.513789	1.12009
	0.540007	0.400461	0.317943	1.50187	0.875861	0.515005	1.1338
	0.546901	0.401025	0.318572	1.53576	0.883552	0.517421	1.15542
	0.54879	0.40228	0.322713	1.6097	0.909959	0.534759	1.16836
	0.549764	0.404789	0.323699	1.62551	0.939356	0.540404	1.17527
	0.550057	0.410237	0.3261	1.633	0.962128	0.542418	1.204
	0.551866	0.414031	0.326723	1.6969	1.00063	0.556277	1.21617
	0.552315	0.417729	0.327224	1.73961	1.00088	0.561642	1.21669
	0.556001	0.418863	0.328798	1.83174	1.00491	0.569709	1.2243
	0.55687	0.421459	0.328894	1.88464	1.0233	0.572608	1.24521
	0.559041	0.421582	0.330214	1.93206	1.05067	0.579223	1.299
	0.561965	0.42222	0.33099	1.99098	1.05866	0.583085	1.32184
	0.573944	0.426336	0.332415	2.16653	1.06353	0.588499	1.33913
	0.57546	0.428487	0.332484	2.23466	1.08972	0.595156	1.35399
	0.576165	0.429152	0.333077	2.31008	1.12415	0.600451	1.36156
	0.588232	0.429448	0.335795	2.50867	1.2277	0.607822	1.39521
	0.589826	0.43659	0.33652	2.55062	1.28603	0.607828	1.39591
	0.590843	0.439171	0.336872	2.5906	1.29532	0.609354	1.41905
	0.592653	0.439726	0.337324	2.72774	1.30792	0.617318	1.41931
	0.595463	0.44042	0.338034	2.75756	1.31062	0.621306	1.42069
	0.604169	0.440764	0.34076	2.84137	1.32148	0.640634	1.46453
	0.61115	0.441787	0.341157	3.0352	1.32939	0.656982	1.49405
	0.619265	0.442624	0.343987	3.89004	1.34384	0.659774	1.49512
	0.620539	0.443	0.344758	4.24922	1.36455	0.662442	1.51148
	0.621935	0.445065	0.346554	4.36335	1.37137	0.677059	1.56792
	0.624654	0.450757	0.34663	4.41019	1.41667	0.680603	1.6418
	0.632781	0.451109	0.349169	4.94112	1.42056	0.710926	1.65466
	0.634772	0.460111	0.349758	5.52582	1.49844	0.714619	1.67469
	0.635337	0.460701	0.349988	5.77318	1.54571	0.717795	1.71095
	0.64052	0.463006	0.351134	5.79977	1.58512	0.723733	1.72085
	0.648725	0.464681	0.351868	5.97615	1.60897	0.732795	1.7321
	0.655962	0.464687	0.353194	6.44606	1.61076	0.754968	1.73542
	0.665994	0.464823	0.355511	7.00801	1.75402	0.755524	1.78032
	0.67098	0.465156	0.359776	7.11932	1.83384	0.756366	1.79422
	0.673379	0.465805	0.36032	7.26926	2.01734	0.783053	1.84971
	0.681659	0.466962	0.361861	7.56192	2.08577	0.803897	1.94697
	0.695666	0.472279	0.363026	7.59112	2.09306	0.821663	1.96737
	0.701962	0.477619	0.363599	7.60814	2.28063	0.842227	1.98434
	0.718563	0.480652	0.365643	7.64684	2.32377	0.844779	1.99512
	0.723625	0.483168	0.370014	7.72595	2.36708	0.854306	2.002
	0.733906	0.488532	0.372281	7.78493	2.3964	0.857443	2.19079
	0.738112	0.490063	0.375694	7.80237	2.40414	0.86466	2.24883
	0.748439	0.491056	0.375788	7.83715	2.46089	0.911417	2.26028
	0.753668	0.49208	0.386641	7.85493	2.60032	0.911826	2.2844
	0.754937	0.494223	0.390252	7.96802	2.74511	0.913787	2.34538
	0.756709	0.495653	0.390306	8.03585	2.88719	0.91987	2.41164
	0.760569	0.499088	0.391309	8.33145	2.92357	0.969324	2.58889
	0.762339	0.49971	0.391371	8.39356	2.9426	1.019	2.61045
	0.76585	0.505461	0.391634	8.47641	3.12562	1.0372	2.66065
	0.769304	0.508712	0.39218	8.77088	3.27636	1.10096	2.67777
	0.775899	0.515524	0.394499	9.06104	3.87877	1.10694	2.67834
	0.787097	0.520564	0.396841	9.0875	3.95271	1.13776	2.74133
	0.787592	0.522415	0.401364	9.66034	3.9797	1.16051	2.74376
	0.813126	0.525114	0.404682	9.71296	4.20125	1.17054	2.80454
	0.823993	0.534316	0.405447	9.74669	4.24016	1.36074	2.80885
	0.852326	0.536015	0.405605	10.6048	4.26769	1.39137	2.82415
	0.854985	0.547825	0.41128	10.6156	4.39012	1.41307	2.84829
	0.867563	0.547975	0.4144	10.6326	4.65	1.41564	2.87635
	0.881704	0.549801	0.421959	10.9075	5.10873	1.418	2.87716
	0.885763	0.553015	0.42577	11.3938	5.25635	1.42047	3.02514
	0.887326	0.558856	0.430932	11.6528	5.36127	1.50626	3.16143
	0.889216	0.559066	0.434556	11.8577	5.80178	1.54026	3.66396
	0.899976	0.563179	0.437687	11.9294	5.87222	1.60827	3.91197
	0.921429	0.564693	0.438037	12.2675	5.98712	1.71136	4.20945
	0.924595	0.571895	0.438098	12.2857	5.99125	1.71914	4.69373
	0.924832	0.572177	0.439563	12.4343	6.05226	1.82078	4.86992
	0.932802	0.573941	0.440963	12.5893	6.30634	1.89114	5.24388
	0.935858	0.574231	0.442317	14.0589	6.31719	1.91865	5.29035
	0.943784	0.578326	0.447375		6.39841	2.06754	5.30271
	0.974903	0.578371	0.448678		6.69297	2.14303	5.34134
	0.99852	0.588816	0.448901		6.8507	2.32742	5.49396
	1.00646	0.588915	0.451925		6.99384	2.45418	5.49967
	1.03873	0.589059	0.453028		7.01725	2.45479	5.64927
	1.04128	0.589117	0.457511		7.02268	2.47783	5.72975
	1.05971	0.590562	0.469392		7.0478	2.60291	5.90456
	1.10643	0.59327	0.470316		7.27721	2.6522	6.52468
	1.20703	0.594301	0.472288		7.29281	2.78963	6.81708
	1.2216	0.596417	0.474871		7.32621	2.87088	7.73688
	1.2221	0.596605	0.475229		7.32942	2.89739	7.77693
	1.45041	0.597005	0.488311		7.35561	3.00157	7.78736
	1.47961	0.602531	0.494509		7.44407	3.02581	7.84119
	1.48904	0.604172	0.500418		7.59143	3.15979	8.08909
	1.61224	0.605575	0.500926		7.72313	3.58301	8.42725
	1.63504	0.606855	0.506882		7.81371	3.75648	8.74416
	1.72339	0.607463	0.508348		7.83593	3.78087	8.93634
	1.74295	0.611668	0.510138		7.85757	3.92522	9.46927
	1.83124	0.612637	0.519419		7.89875	4.28265	9.9939
	2.04584	0.613413	0.521862		7.95282	4.88728	10.4587
	2.14264	0.615528	0.525189		7.96613	5.51089	10.4853
	2.31282	0.617531	0.529111		8.16288	5.71279	10.6202
	2.36362	0.620426	0.533951		8.33149	6.03055	10.7469
	2.37381	0.624	0.535713		8.35596	6.28834	10.8877
	2.42698	0.627248	0.540569		8.35903	6.31604	11.0709
	2.56144	0.629613	0.548435		8.39402	6.52657	11.0914
	2.77464	0.634691	0.552205		8.42846	7.06891	11.279
	2.8944	0.635954	0.561014		8.47393	7.2816	11.3972
	2.93062	0.642994	0.562618		8.64665	7.33459	11.5142
	2.94228	0.643228	0.567841		8.68137	7.58404	11.6644
	2.9585	0.645524	0.573859		8.83356	7.64736	12.1493
	2.96124	0.648476	0.575451		9.16191	8.32181	12.2267
	3.09499	0.649102	0.578796		9.17253	8.51718	12.2413
	3.27372	0.652255	0.582382		9.30305	8.69989	12.3773
	3.29802	0.65429	0.587484		9.31417	9.01055	12.5544
	3.31683	0.654648	0.589299		9.58521	9.02923	13.0771
	3.59704	0.659883	0.592849		9.71134	9.3209	13.1498
	3.59936	0.663982	0.594686		9.78746	9.78915	14.0827
	3.59956	0.66726	0.595561		9.90149	9.85342	14.2606
	3.64776	0.667943	0.601289		9.96054	10.1099
	3.73068	0.669514	0.610451		9.97441	10.221
	3.87644	0.68211	0.616717		10.2223	10.6088
	4.03499	0.686809	0.622164		10.2583	10.7449
	4.2781	0.694915	0.654291		10.3491	11.1565
	4.29228	0.695509	0.654329		10.4756	12.6976
	4.3171	0.710072	0.663741		10.4776	12.8223
	4.4628	0.72093	0.666136		10.6245	13.5518
	4.61188	0.723547	0.674015		10.725	17.239
	4.7223	0.725164	0.689457		10.7906
	4.84932	0.727553	0.708363		10.8435
	4.87012	0.734744	0.715011		10.9309
	4.97742	0.741061	0.721844		10.9397
	4.99397	0.74279	0.725247		10.9693
	5.17481	0.745294	0.740888		10.9698
	5.31806	0.746113	0.748216		11.069
	5.54146	0.746978	0.749183		11.0938
	5.90556	0.752386	0.756342		11.271
	6.08433	0.756985	0.766362		11.4728
	6.11841	0.764013	0.777601		11.7625
	6.39998	0.764786	0.789316		11.9345
	6.58991	0.773604	0.829394		11.9503
	6.66717	0.782538	0.830739		12.1621
	7.35606	0.794525	0.840183		13.1056
	7.99898	0.794855	0.845916		13.1622
		0.805772	0.854231		13.3804
		0.809587	0.862608		13.3844
		0.820528	0.863182		13.5002
		0.841387	0.863779		13.6333
		0.844834	0.864836		13.6463
		0.847375	0.870518		13.8963
		0.871771	0.874158		13.92
		0.881699	0.886062		14.1471
		0.89365	0.906743		14.6212
		0.897646	0.91741		14.7319
		0.903459	0.935318		15.1658
		0.918156	0.970935		16.1292
		0.923754	0.978456		16.1696
		0.926983	0.98037		16.7102
		0.929056	1.00517
		0.948074	1.00891
		0.963685	1.03876
		0.970147	1.0407
		1.01995	1.04202
		1.04945	1.06772
		1.07299	1.08996
		1.07447	1.09676
		1.10068	1.13206
		1.12949	1.26241
		1.13125	1.27184
		1.18718	1.28695
		1.19177	1.30103
		1.20957	1.32476
		1.21536	1.32486
		1.29424	1.33604
		1.29587	1.385
		1.30455	1.41903
		1.31727	1.4472
		1.33439	1.46916
		1.3792	1.5347
		1.41124	1.55095
		1.41455	1.56104
		1.41687	1.6355
		1.42376	1.79464
		1.45253	1.98282
		1.46129	2.27884
		1.50547	2.29291
		1.51561	2.41754
		1.51824	2.42433
		1.55441	2.45942
		1.55801	2.52588
		1.57272	2.5643
		1.57965	2.66709
		1.64684	2.69131
		1.68154	2.73909
		1.71669	2.79022
		1.79461	2.84694
		1.79534	2.88131
		1.84885	2.88415
		2.12159	3.17521
		2.15668	3.3847
		2.21246	3.46007
		2.40694	3.5731
		2.44323	3.90874
		2.4765	4.02604
		2.69598	4.30533
		2.869	4.44526
		2.87336	4.48309
		2.8992	4.64332
		3.06695	4.74165
		3.08235	4.91271
		3.34808	5.09183
		3.47946	5.19159
		3.8041	5.26199
		3.98708	5.29046
		4.00015	5.35513
		4.15089	5.51141
		4.35402	5.73975
		4.38546	5.95977
		4.44182	6.07715
		4.49334	7.27794
		4.64847	7.53143
		4.77773	9.36422
		4.7996	10.0254
		4.87604	12.0262
		4.89803	12.6483
		4.9206
		5.01948
		5.17599
		5.53851
		5.63607
		5.71885
		5.79792
		5.93859
		6.14624
		6.32854
		6.65707
		6.78683
		7.17165
		7.23117
		7.37243
		7.40116
		7.4894
		7.5017
		7.60113
		7.85237
		7.97039
		8.05839
		8.35487
		8.67064
		8.79942
		8.92139
		9.24183
		9.48391
		9.49236
		9.65988
		9.91336
		10.0891
		10.1788
		10.4619
		10.5399
		10.7094
		10.883
		11.0186
		11.1883
		12.036

## Sheet: Fig. 4G
Figure 4G
Proliferation (relative)
	WT	FLOT2-GFP	∆N-FLOT2-GFP	Wnt3	FLOT2-GFP + Wnt3	∆N-FLOT2-GFP + Wnt3	FLOT2-GFP + Wnt3 + IRSp534K-GFP		Relative cell numbers (compared to WT)
	1.12936	1.2115	0.944559	1.2115	1.1499	0.759754	1.31417
	0.944559	0.965092	0.698152	1.10883	1.06776	0.677618	1.66324
	0.698152	1.1499	0.718686	1.60164	1.43737	1.06776	1.23203
	0.759754	1.43737	0.924025	1.70431	1.10883	0.985626	1.56057
	0.595483	1.06776	0.759754	1.35524	1.31417	1.00616	1.51951
	1.17043	0.759754	0.451745	2.23819	1.17043	0.924025	1.19097
	1.10883	1.23203	0.759754	1.45791	1.12936	1.02669	1.3963
	0.903491	1.04723	0.780287	1.3963	1.2731	0.882957	1.2731
	0.944559	0.882957	0.574949	2.03285	1.2731	0.841889	1.25257
	0.924025	2.03285	0.862423	1.60164	1.31417	1.19097	0.927835
	1.00616	1.17043	1.12936	1.51951	2.32033	1.2731	1.13402
	1.02669	1.90965	0.533881	1.86858	2.09446	1.25257	0.996564
	1.37577	1.3347	1.2731	1.12936	1.99179	1.97125	0.927835
	0.800821	1.47844	1.31417	1.51951	2.05339	1.84805	1.23711
	0.965092	0.965092	0.821355	1.25257	2.21766	1.23203	1.34021
	0.657084	1.02669	0.574949	1.35524	2.6078	1.12936
	1.02669	1.41684	0.780287	1.19097	1.56057	1.2115
	0.985626	0.862423	1.25257	1.93018	1.56057	1.20275
	1.1499	1.23203	0.73922	1.56057	1.27148	1.27148
	1.47844	1.49897	0.882957	1.23711	2.26804	0.927835
	1.10883	1.25257	1.00616	1.34021	1.95876	1.27148
	0.882957	1.68378	0.800821	1.20275	1.68385	0.790378
	1.3347	1.90965	1.58111	1.37457		1.06529
	0.821355	1.82752	1.06776	1.34021		0.962199
	1.41684	1.1499	1.29363	1.13402
	1.00616	0.985626	0.924025	1.03093
	0.780287	1.25257		1.06529
	1.00616
	1.00029	1.28679	0.901911	1.43556	1.6285	1.11553	1.2644

## Sheet: Fig. 4H
Figure 4H
BrdU Assay
	Control	Flot2	∆N-Flot2	IRSp534K	Wnt3	IRSp534K + Wnt3	Flot2 + Wnt3	∆N-Flot2 + Wnt3	Flot2 + IRSp534K + Wnt3
	35.955	43.564	32.906	26.425	48.571	49.383	51.739	42.697	45.455
	50	53.571	31.923	37.647	56.931	45.455	56.111	54.032	56.828
	41.53	43.719	44.944	35.714	49	48.77	48.148	50.676	44.541
	44.371	43.86	38.073	25.926	45.509	48	57.576	52.033	52.551
	47.458	40.513	34.409	22.424	51.98	44.279	52.778	56.667	50.5
	41.1	54.211	27.434	43.103	50.237	59.2	55.495	46.269	58.559
	40.909	50.292	42.553	44.019	49.359	52.604	57.471	46.154	49.664
	50.926	53.165	49.673	45.213	59.887	50.794	55.602	44.697	52.41
	42.202	38.914	37.079	40.426	43.262	46.626	54.335	49.495	47.619
	46.774	40.191	37.959	32.184	47.191	58.192	55.372	49.167	50.968
	39.161	45.418	41.294	31.073	46.269	50.562	48.221	51.128	45.856
	49.58	42.197	47.059	27.586	52	38	52.713	51.572	43.434
	29.293	38.117	46.4	41.406	53.552	42.331	51.613	53.061	44.776
	34.831	49.261	30.282	39.231	51.63	39.759	58	45.342	45
	35.821	38.462	28.761	48.171	51.064	46.341	56.881	52.809	44.785
	41.304	41.627	43.646	34.94	47.328	35.294	65.698	36.923	36.283
	44.355	52.326	37.222	41.216	46.988	41.86	60.894	46.753	39.796
	51.316	51.099	43.367	40.179	51.807	44.828	60.241	42.727	47.5
	47.2	49.708	38.021	45.27	49.153	52.294	59.286	43.038	52
	43.066	44.554	35.514	41.414	50	49.18	68.707	36.709	51.163
