# Supplementary material for: The scaffolding protein flot2 promotes cytoneme-based transport of wnt3 in gastric cancer
Source: eLife. 2022 Aug 30;11:e77376. doi: 10.7554/eLife.77376 (PMC9457691; doi:10.7554/eLife.77376)
Supplement: Figure 5—source data 1. [file elife-77376-fig5-data1.xlsx]

## Sheet: Fig. 5F
Figure 5F
Pearson's Correlation Co-efficient
	Marker	Ror2-mCh	FLOT2 siRNA + Ror2-mCh
	mTurq2-Golgi	0.17	0.85
		0.28	0.79
		0.43	0.72
		0.35	0.81
		0.35	0.88
		0.43	0.84
		0.29	0.7
		0.28	0.86
		0.23
		0.31
		0.312	0.80625
	LAMP1-mTurq2	0.28	0.26
		0.41	0.25
		0.18	0.22
		0.3	0.5
		0.42	0.5
		0.49	0.63
		0.51	0.51
		0.37
		0.37	0.41
	Rab5-GFP	0.29	0.51
		0.2	0.46
		0.19	0.55
		0.5	0.39
		0.25	0.31
		0.36	0.41
		0.35
		0.29
		0.39
		0.38
		0.32	0.438333
	Rab7-GFP	0.31	0.64
		0.42	0.6
		0.65	0.73
		0.36	0.71
		0.38	0.44
		0.54	0.22
		0.59	0.43
		0.464286	0.538571

## Sheet: Fig. 5H
Figure 5H
Autocrine JNK Reporter (relative)
	WT	FLOT2-GFP	∆N-FLOT2-GFP	Ror2-BFP	Ror2-BFP + FLOT2-GFP	Ror2-BFP + ∆N-FLOT2-GFP
	0.101414	0.0279058	0.108271	0.0268367	0.0826831	0.10821		Categorised by value (ascending)
	0.164421	0.0890574	0.12419	0.0575184	0.184065	0.160513
	0.173533	0.109023	0.135463	0.102863	0.257248	0.169416
	0.175022	0.142186	0.179798	0.156842	0.347816	0.171544
	0.186209	0.152813	0.220868	0.169174	0.351017	0.194612
	0.186899	0.16765	0.229216	0.231177	0.369603	0.231732
	0.199377	0.194694	0.254288	0.24211	0.377254	0.233032
	0.203443	0.209693	0.255918	0.254835	0.390323	0.261951
	0.207226	0.239934	0.265389	0.255165	0.394228	0.290952
	0.222994	0.256423	0.274039	0.27456	0.407218	0.29771
	0.223945	0.265787	0.283595	0.276496	0.414037	0.308369
	0.226891	0.316616	0.285755	0.294229	0.434163	0.31328
	0.234919	0.342196	0.297331	0.316086	0.438113	0.313913
	0.238359	0.365787	0.298712	0.319782	0.440043	0.31608
	0.246379	0.366012	0.321855	0.34939	0.462527	0.329236
	0.272158	0.38128	0.324243	0.360982	0.498961	0.330718
	0.275332	0.393751	0.332084	0.368758	0.510901	0.338662
	0.27631	0.404952	0.33349	0.376194	0.530559	0.339476
	0.278653	0.412347	0.340675	0.389582	0.540936	0.34156
	0.280454	0.419095	0.355964	0.394004	0.572934	0.34165
	0.281066	0.422563	0.356217	0.403187	0.576337	0.341728
	0.28242	0.424561	0.361203	0.40928	0.588339	0.351315
	0.284503	0.424565	0.361767	0.410925	0.589982	0.352638
	0.286194	0.450486	0.372986	0.418406	0.591102	0.353208
	0.292116	0.453842	0.373696	0.419384	0.594753	0.363273
	0.29851	0.459428	0.384332	0.442444	0.603082	0.365312
	0.300072	0.478292	0.385172	0.444031	0.617162	0.367097
	0.304516	0.481084	0.385412	0.444458	0.633084	0.379929
	0.309223	0.497017	0.396967	0.444764	0.633454	0.389257
	0.314705	0.503595	0.402794	0.462527	0.676997	0.403485
	0.316343	0.503789	0.415557	0.465553	0.689044	0.40602
	0.316963	0.50967	0.4324	0.469985	0.717458	0.411159
	0.319698	0.512101	0.433589	0.480532	0.720823	0.422906
	0.327531	0.519746	0.433865	0.490946	0.72684	0.425421
	0.329118	0.530241	0.446403	0.491961	0.737729	0.425467
	0.3301	0.545103	0.447778	0.500884	0.747279	0.440407
	0.330403	0.546028	0.452087	0.508748	0.759819	0.44763
	0.339622	0.554506	0.459892	0.50878	0.773906	0.448701
	0.342365	0.563393	0.461961	0.515986	0.787077	0.458736
	0.344092	0.584218	0.463363	0.518044	0.788244	0.461544
	0.354277	0.597679	0.498513	0.52811	0.800724	0.463185
	0.354328	0.598819	0.552233	0.53706	0.82231	0.471466
	0.354721	0.598893	0.555498	0.537891	0.82518	0.476726
	0.357513	0.606538	0.563397	0.539967	0.829185	0.490832
	0.358006	0.618451	0.563542	0.560158	0.843339	0.520043
	0.359573	0.639	0.570261	0.569268	0.852382	0.521226
	0.361542	0.656524	0.570327	0.577111	0.858642	0.522817
	0.364466	0.659566	0.577168	0.589557	0.874051	0.524815
	0.366632	0.671659	0.578601	0.595887	0.877284	0.533414
	0.369305	0.672817	0.582903	0.600193	0.885727	0.546454
	0.369924	0.701705	0.588436	0.603705	0.90294	0.553166
	0.374298	0.705495	0.625655	0.614274	0.910151	0.564531
	0.374973	0.717546	0.641003	0.616637	0.932052	0.597362
	0.379032	0.725856	0.654318	0.617214	0.936647	0.618587
	0.385673	0.730393	0.655006	0.61832	0.940949	0.675693
	0.388421	0.731742	0.659118	0.620774	0.972315	0.68575
	0.3917	0.735224	0.704013	0.632334	0.994659	0.688475
	0.395477	0.73665	0.717388	0.647092	1.01832	0.711635
	0.396405	0.748807	0.719432	0.657256	1.03908	0.722037
	0.398015	0.759253	0.729617	0.657978	1.04232	0.734158
	0.398606	0.760449	0.746776	0.682192	1.05415	0.750557
	0.405186	0.764512	0.786832	0.691119	1.05629	0.753877
	0.406566	0.778409	0.798737	0.700826	1.10291	0.76008
	0.410408	0.780832	0.801681	0.709142	1.12698	0.760096
	0.410955	0.782223	0.822295	0.723731	1.15872	0.766184
	0.411204	0.790008	0.866559	0.739665	1.17865	0.770812
	0.411595	0.791394	0.880277	0.752023	1.20784	0.781087
	0.413909	0.811305	0.921548	0.762048	1.22133	0.799148
	0.41464	0.826939	0.933059	0.784361	1.25667	0.81576
	0.418988	0.83683	0.978749	0.785784	1.2891	0.829697
	0.422784	0.852864	1.05271	0.795667	1.29111	0.867033
	0.422898	0.858526	1.14591	0.811392	1.38259	0.908274
	0.425326	0.85944	1.23708	0.81337	1.40444	0.957201
	0.426991	0.863434	1.28848	0.813675	1.41104	0.968097
	0.428507	0.865316		0.821536	1.49809	0.993295
	0.43004	0.865406		0.828796	1.51412	1.03176
	0.433123	0.867219		0.855746	1.52659	1.08251
	0.436128	0.904106		0.858011	1.63092	1.12414
	0.437224	0.918789		0.860999	1.79133	1.13308
	0.441682	0.92918		0.869654	1.82482
	0.44262	0.931115		0.888807	2.08951
	0.44292	0.959617		0.893977	2.24307
	0.44317	0.971351		0.900561
	0.448946	0.973713		0.914828
	0.453971	1.00128		0.943271
	0.458538	1.03473		0.979874
	0.459435	1.03489		0.986366
	0.463731	1.0369		1.0046
	0.465889	1.03835		1.01531
	0.468466	1.04212		1.05295
	0.476413	1.04235		1.09574
	0.484166	1.04793		1.12163
	0.493959	1.06333		1.1568
	0.496458	1.0662		1.16855
	0.502959	1.07327		1.17084
	0.503739	1.11316		1.17874
	0.504995	1.13483		1.18187
	0.51977	1.18907		1.19295
	0.538455	1.25568		1.27713
	0.541986	1.26787		1.29676
	0.54562	1.29628		1.32183
	0.565002	1.40435		1.37011
	0.572821	1.45798		1.47695
	0.577281	1.62571		1.51811
	0.586691	1.64656		1.52846
	0.590147	1.65096		1.5331
	0.620285	1.85951		1.5518
	0.628415	2.49694		1.62193
	0.631473	2.51835		2.41173
	0.635905
	0.641658
	0.652193
	0.667544
	0.672291
	0.673922
	0.67496
	0.680913
	0.69106
	0.696922
	0.793203
	0.83858
	0.842616
	0.85161
	0.852761
	0.862283
	0.941029
	0.979789
	1.07532
	1.09034
	1.12914
	1.20255
	1.21592
	1.26087
	1.26546
	1.28986
	1.38756

## Sheet: Fig. 5J, K
Figure 5J, K
Filopodia quantifications
	Filopodia Length							Cumulative Length							Filopodia Number
	WT	Ror2	∆CRD-Ror2	Ror2 + FLOT2	Ror2 + ∆N-FLOT2	∆CRD-Ror2 + FLOT2		WT	Ror2	∆CRD-Ror2	Ror2 + FLOT2	Ror2 + ∆N-FLOT2	∆CRD-Ror2 + FLOT2		WT	Ror2	∆CRD-Ror2	Ror2 + FLOT2	Ror2 + ∆N-FLOT2	∆CRD-Ror2 + FLOT2
	6.21662	6.84504	3.38014	6.57359	5.12733	4.51141		130.549	177.971	70.983	348.854	199.966	175.945		21	26	21	50	39	39
	6.51665	5.10825	3.57137	5.88217	3.50658	7.16382		110.783	270.737	57.142	211.758	66.625	351.027		21	53	16	36	19	49
	4.14943	4.37919	2.47092	7.87123	4.62237	4.31886		124.483	183.926	123.546	377.819	110.937	328.233		30	42	50	48	24	76
	5.08669	8.45087	3.224	8.77093	4.62187	6.70786		259.421	447.896	132.184	403.463	69.328	335.393		51	53	41	46	15	50
	5.96111	7.81058	3.1786	9.93709	6.19314	6.39874		220.561	281.181	111.251	317.987	86.704	217.557		37	36	35	30	14	34
	6.86803	6.89358	2.4724	16.3755	8.06007	4.40219		487.63	213.701	61.81	867.904	225.682	189.294		71	31	25	53	28	43
	5.41761	5.374	2.78873	5.96491	4.3964	5.42654		335.892	150.472	61.352	137.193	131.892	222.488		62	28	22	23	30	41
	5.36265	7.5668	3.1076	5.40559	4.21624	7.31957		332.484	537.243	177.133	318.93	105.406	256.185		62	71	57	59	25	35
	6.13396	5.7487	3.90692	13.4223	3.40187	3.80791		294.43	212.702	148.463	402.668	27.215	258.938		48	37	38	30	8	68
	3.75286	6.3272	2.62927	9.51876	5.31344	6.1518		187.643	284.724	115.688	314.119	170.03	436.778		50	45	44	33	32	71
	5.72283	9.36487	4.62285	12.4759	4.92629	5.02261		137.348	674.271	120.194	885.788	83.747	190.859		24	72	26	71	17	38
	3.48948	6.41124	3.87068	7.19267	3.72473	4.465		153.537	314.151	143.215	388.404	193.686	116.09		44	49	37	54	52	26
	3.36506	4.17858	2.483	6.99358	3.59017	9.4276		114.412	129.536	72.007	181.833	82.574	424.242		34	31	29	26	23	45
	3.57032	5.32917	3.98547	14.3375	2.01305	4.03065		157.094	255.8	127.535	559.163	42.274	209.594		44	48	32	39	21	52
	5.53847	5.48397	2.80127	5.20445	3.00992	4.74036		432.001	334.522	103.647	322.676	114.377	199.095		78	61	37	62	38	42
	7.75903	5.83268	3.40846	11.3884	2.75455	5.66581		232.771	256.638	88.62	501.09	90.9	152.977		30	44	26	44	33	27
	6.86221	7.85994	3.32187	6.22079	4.36458	9.09554		288.213	259.378	126.231	180.403	157.125	354.726		42	33	38	29	36	39
	4.7225	8.76049	2.81086	5.34603	2.83159	8.44082		207.79	569.432	59.028	176.419	82.116	320.751		44	65	21	33	29	38
	4.77018	7.29684	2.88935	5.5246	1.84591	8.09993		157.416	364.842	124.242	303.853	40.61	372.597		33	50	43	55	22	46
	4.05856	7.55325	3.00073	5.99808	4.125	5.47103		101.464	211.491	123.03	305.902	49.5	410.327		24	28	41	51	12	75
	4.81816	7.96161	3.90022	6.43787	4.91233	4.92554		120.454	262.733	179.41	289.704	58.948	236.426		25	33	46	45	12	48
	5.79057	7.39365		9.79124	5.10029			387.968	317.927		489.562	122.407			67	43		50	24
	5.20155			9.36967	3.7528			275.682			402.896	56.292			54			43	15
	4.25707				3.47111			238.396				97.191			56				28
	5.04948				4.99158			166.633				164.722			33				33
	5.21764	6.72411	3.22975	8.52186	4.19493	5.98065		226.202	305.058	110.796	377.756	105.21	269.093		43.4	44.5	34.5238	43.913	25.16	46.7619
	Average of each cell measured
