# Supplementary material for: The scaffolding protein flot2 promotes cytoneme-based transport of wnt3 in gastric cancer
Source: eLife. 2022 Aug 30;11:e77376. doi: 10.7554/eLife.77376 (PMC9457691; doi:10.7554/eLife.77376)
Supplement: Figure 6—source data 1. [file elife-77376-fig6-data1.xlsx]

## Sheet: Fig. 6D, E
Figure 7D, E
Zebrafish Filopodia Quantifications
	Cumulative length				Filopodia number
	WT	Flot2-GFP	∆N-Flot2-GFP		WT	Flot2-GFP	∆N-Flot2-GFP		Average of each cell measured
	62.111	157.732	24.699		15	9	6
	70.385	100.434	33.992		18	6	10
	30.151	66.956	31.721		5	18	7
	15.741	39.462	17.84		5	7	5
	27.041	46.634	17.465		7	6	5
	29.957	37.781	18.055		8	8	5
	46.028	38.347	39.568		9	6	9
	57.651	53.097	48.813		12	10	12
	47.99	40.291	24.097		11	9	5
	40.779	40.059	40.322		9	8	8
	31.813	60.815	12.101		7	7	3
	51.311	139.319	40.654		10	14	8
	30.178	103.449	17.476		6	17	4
	41.944	68.22	21.094		9	9	4
	45.987	114.787			7	21
	77.919	88.322			15	14
	45.555	92.502			8	13
		64.725				11
		85.072				10
		93.495				16
	44.2671	76.5749	27.7069		9.47059	10.95	6.5

## Sheet: Fig. 6G, H
Figure 7G, H
In situ hybridisation
	MB + FB length (um)								Phenotype severity
	Control	Flot2-GFP	Wnt8a-mCh	Flot2-GFP + Wnt8a-mCh	∆N-Flot2-GFP + Wnt8a-mCh				memCherry	Flot2-GFP	Wnt8a-mCh	Flot2-GFP + Wnt8a-mCh	∆N-Flot2-GFP + Wnt8a-mCh
	387.9	272.312	202.087	106.5	374.94				Normal	Mild	Mild	Mild	Mild
	400	251.099	408.058	0	250.897				Normal	Mild	Mild	Mild	Mild
	335.3	0	296.282	0	0				Normal	Mild	Mild	Mild	Mild
	319.2	414.286	0	0	370.703				Normal	Mild	Mild	Mild	Mild
	330.1	293.626	292.881	307.741	262.633				Normal	Mild	Mild	Mild	Mild
	373.1	314.945	395.7	378.047	333.566				Normal	Normal	Mild	Normal	Mild
	296	297.363	373.5	258.788	343.233				Normal	Normal	Mild	Severe	Mild
	293	226.374	115.6	286.246	293.308				Normal	Normal	Mild	Severe	Normal
	356.3	302.198	378.436	290.935	384				Normal	Normal	Mild	Severe	Normal
	348.3	397.1	228.4	324.1	339.5				Normal	Normal	Mild	Severe	Normal
	364.5	401.8	303.058	257.4	381.5				Normal	Severe	Mild	Severe	Normal
	314.6	366.5	353.979	0	367.8				Normal	Severe	Mild	Severe	Normal
	329.3	324	322.7	340.4	390.4				Normal	Severe	Normal	Severe	Severe
	342.8	310.9	370.173	0	403.5				Normal	Severe	Normal	Severe	Severe
	338.5	357.2	265.503	331.5	407.1				Normal	Severe	Normal	Severe	Severe
	415.9	293.4	338.927	309	316.5				Normal	Severe	Normal	Severe	Severe
	364.5		410.8	430.6	197.4				Normal		Normal	Severe	Severe
	309.7		0	0	342.4				Normal		Severe	Severe	Severe
	338.5		0						Normal		Severe
	392.7		393						Normal		Severe
	322.4		0						Normal		Severe
	323.2		288						Normal		Severe
	373.3		0						Normal		Severe
			257.5								Severe
			399								Severe
			396.3								Severe
			270.3								Severe
